# Supplementary material for: Modulating Chikungunya and Mayaro virus-induced disease severity in mice using low concentrations of anti-IFNAR1 antibodies
Source: Emerg Microbes Infect. 2026 Jan 14;15(1):2611479. doi: 10.1080/22221751.2025.2611479 (PMC12805855; doi:10.1080/22221751.2025.2611479)
Supplement: Supplementary Tables 2025_05_30.xlsx [file TEMI_A_2611479_SM4370.xlsx]

## Sheet: Information
Supplementary Materials
Modulating Chikungunya and Mayaro virus induced disease severity in mice using low concentrations of anti-IFNAR1 antibodies
Konrad Wesselmanna#, Léa Luciania,b, Gregory Moureaua, Jean-Selim Driouicha,b, Ornellie Bernadina, Magali Gillesa, Xavier de Lamballeriea,b,c, Antoine Nougairèdea,b
aUnité des Virus Émergents (UVE: Aix-Marseille Univ, Università di Corsica, IRD 190, Inserm 1207, IRBA), France.
bAssistance Publique-Hôpitaux de Marseille (AP-HM), Service de Virologie Aiguë et Tropicale, Marseille, France.
cNational Reference Center for Arboviruses, Inserm-IRBA, Marseille, France.
#Address correspondence to Konrad Wesselmann: konrad.wesselmann@univ-amu.fr

## Sheet: Table S1
Supplementary Table 1: ELISA results of mice infected with varying doses of CHIKV, MAYV or ONNV with varying doses of previously injected anti-IFNAR1 mAb (0.1, 0.3, 1 or 1+0.5mg). Virus specific ELISA tests were performed for CHIKV and MAYV. For ONNV a CHIKV-specific ELISA was used. Indicated are the group names (virus used for infection, viral load in TCID50, and anti-IFNAR1 mAb dose in mg), the…
a)	ELISA results
	CHIKV infection with very high or very low preceding doses of anti-IFNAR1 mAb
	group name	0 TCID50, 1mg, 24h	CHIKV, 103 TCID50, 0mg	CHIKV, 103 TCID50, 1mg, 24h	CHIKV, 102 TCID50, 0.1mg, 24h	CHIKV, 103 TCID50, 1mg, 48h	CHIKV, 102 TCID50, 0,1mg, 48h
	n	6	6	4	6	6	6
	% of positivess	0	100	50	33.3	83.3	66.6
	OD450 of replicates	0.013	0.707	0.013	0.011	0.011	0.777
		0.016	0.828	0.013	0.829	0.807	0.832
		0.027	0.739	Death	0.016	Death	0.012
		0.018	0.012	Death	0.755	Death	0.724
		0.015	0.681		0.016	Death	0.006
		0.016	0.874		0.014	Death	0.803
b)	ELISA results
	CHIKV infection with varying infectious doses and varying preceding doses of anti-IFNAR1 mAb
	group name	CHIKV, 103 TCID50, 0.1mg	CHIKV, 104 TCID50, 0.1mg	CHIKV, 105 TCID50, 0.1mg	CHIKV, 103 TCID50, 0.3mg	CHIKV, 104 TCID50, 0.3mg	CHIKV, 105 TCID50, 0.1mg
	n	5	6	6	6	6	6
	% of positivess	80	66.6	100	83.3	100	100
	OD450 of replicates	0.028	0.91	0.821	Death	Death	0.451
		0.826	0.779	0.606	Death	Death	0.361
		0.878	0.744	0.621	0.77	Death	0.509
			0.764	0.613	0.816	0.815	0.608
		0.862	0.74	0.617	0.017	0.797	0.701
		0.813	0.872	0.696	0.815	0.793	0.619
c)	ELISA results
	CHIKV infection in young and mature mice with a preceding dose of 0.1mg anti-IFNAR1 mAb and a high viral titer of 105TCID50
	group name	CHIKV, 105 TCID50, 0.1mg, 7 weeks old	CHIKV, 105 TCID50, 0.1mg, 11 weeks old
	n	6	6
	% of positivess	100	100
	OD450 of replicates	0.654	0.731
		0.788	0.713
		0.575	0.648
		0.59	0.691
		0.785	0.654
		0.651	0.724
d)	ELISA results
	MAYV infection with very high or very low preceding doses of anti-IFNAR1 mAb
	group name	MAYV, 104 TCID50, 0.0mg, 24h	MAYV, 103 TCID50, 0.1mg, 24h	MAYV, 104 TCID50, 1.0mg, 24h	MAYV, 103 TCID50, 0,1mg, 48h	MAYV, 104 TCID50, 1,0mg, 48h
	n	6	6	6	6	6
	% of positivess	100	50	83.3	100	100
	OD450 of replicates	1.329	0.009	Death	1.134	Death
		1.304	1.218	Death	1.17	Death
		1.163	1.355	Death	1.397	Death
		1.043	1.162	Death	1.166	Death
		1.173	0.007	0.008	1.173	Death
		1.37	0.006	1.145	1.114	1.122
e)	ELISA results
	MAYV infection with 103TCID50 or 105TCID50 and a preceding dose of 0.1mg anti-IFNAR1 mAb
	group name	MAYV, 105 TCID50, 0.1mg	MAYV, 103 TCID50, 0.1mg
	n	6	6
	% of positivess	100	100
	OD450 of replicates	0.752	0.809
		1.036	0.567
		0.98	0.851
		0.869	0.805
		0.843	0.711
		0.65	0.656
f)	ELISA results
	MAYV infection in young and mature mice with a preceding dose of 0.1mg anti-IFNAR1 mAb and a high viral titer of 105TCID50
	group name	MAYV, 105 TCID50, 0.1mg, 7 weeks old	MAYV, 105 TCID50, 0.1mg, 11 weeks old
	n	6	6
	% of positivess	100	100
	OD450 of replicates	0.993	0.978
		1.024	1.176
		1.037	1.186
		0.948	1.126
		1.026	0.989
		0.987	1.049
g)	ELISA results
	Low susceptibility of mice for ONNV infection
	group name	ONNV, 105 TCID50, 0.0mg	ONNV, 104 TCID50, 0.1mg	ONNV, 105 TCID50, 0.1mg	ONNV, 105 TCID50, 1.0mg	ONNV, 105 TCID50, 1.0mg + 0.5mg
	n	6	6	6	6	6
	% of positivess	16.6	66.6	100	100	100
	OD450 of replicates	0.064	0.195	0.693	0.91	0.405
		0.01	0.658	0.888	0.856	0.446
		0.271	0.833	0.823	0.697	0.458
		0.073	0.756	0.981	0.575	0.551
		0.01	0.011	0.604	0.874	0.59
		0.012	0.009	0.826	0.824	0.684

## Sheet: Table S2
Supplementary Table 2: Statistical analysis of CHIKV infection with very high or very low preceding doses of anti-IFNAR1 mAb.
a)	Comparison of Survival
	Log-rank (Mantel-Cox) test
	Groups	CHIKV, 103 TCID50, 0mg
		0 TCID50, 1mg, 24h	CHIKV, 103 TCID50, 1mg, 24h	CHIKV, 102 TCID50, 0.1mg, 24h	CHIKV, 103 TCID50, 1mg, 48h	CHIKV, 102 TCID50, 0,1mg, 48h
	Number of replicates (n)	6, 6	6, 4	6, 6	6, 6	6, 6
	Chi square	0	3.471	0	5.604	0
	df	1	1	1	1	1
	P value	>0,9999	0.0624	>0,9999	0.0179	>0,9999
	P value summary	ns	ns	ns	*	ns
	Are the survival curves sig different?	No	No	No	Yes	No
b)	Comparison of Severe disease
	Log-rank (Mantel-Cox) test
	Groups	103 TCID50, 0mg
		0 TCID50, 1mg, 24h	CHIKV, 103 TCID50, 1mg, 24h	CHIKV, 102 TCID50, 0.1mg, 24h	CHIKV, 103 TCID50, 1mg, 48h	CHIKV, 102 TCID50, 0,1mg, 48h
	Number of replicates (n)	6, 6	6, 4	6, 6	6, 6	6, 6
	Chi square	0	3.471	0	8.241	2.195
	df	1	1	1	1	1
	P value	>0,9999	0.0624	>0,9999	0.0041	0.1385
	P value summary	ns	ns	ns	**	ns
	Are the survival curves sig different?	No	No	No	Yes	No
c)	Comparison of Symptomatic disease
	Log-rank (Mantel-Cox) test
	Groups	103 TCID50, 0mg
		0 TCID50, 1mg, 24h	CHIKV, 103 TCID50, 1mg, 24h	CHIKV, 102 TCID50, 0.1mg, 24h	CHIKV, 103 TCID50, 1mg, 48h	CHIKV, 102 TCID50, 0,1mg, 48h
	Number of replicates (n)	6, 6	6, 4	6, 6	6, 6	6, 6
	Chi square	0	2.195	12.43	5.549	10.36
	df	1	1	1	1	1
	P value	>0,9999	0.1385	0.0004	0.0185	0.0013
	P value summary	ns	ns	***	*	**
	Are the survival curves sig different?	No	No	Yes	Yes	Yes

## Sheet: Table S3
Supplementary Table 3: Statistical analysis of CHIKV infection with varying infectious doses and varying preceding doses of anti-IFNAR1 mAb.
a)	Comparison of Survival
	Log-rank (Mantel-Cox) test
	Groups	CHIKV, 105 TCID50, 0.0mg
		CHIKV, 103 TCID50, 0.1mg	CHIKV, 104 TCID50, 0.1mg	CHIKV, 105 TCID50, 0.1mg	CHIKV, 103 TCID50, 0.3mg	CHIKV, 104 TCID50, 0.3mg	CHIKV, 103 TCID50, 0.1mg	CHIKV, 105 TCID50, 0.1mg
	Number of replicates (n)	6, 5	6, 6	6, 6	6, 6	6, 6	6, 6	6, 6
	Chi square	0	0	0	2.2	3.669	5.604	5.5
	df	1	1	1	1	1	1	1
	P value	>0,9999	>0,9999	>0,9999	0.138	0.0554	0.0179	0.019
	P value summary	ns	ns	ns	ns	ns	*	*
	Significant difference?	No	No	No	No	No	Yes	Yes
b)	Comparison of Severe disease
	Log-rank (Mantel-Cox) test
	Groups	CHIKV, 105 TCID50, 0.0mg
		CHIKV, 103 TCID50, 0.1mg	CHIKV, 104 TCID50, 0.1mg	CHIKV, 105 TCID50, 0.1mg	CHIKV, 103 TCID50, 0.3mg	CHIKV, 104 TCID50, 0.3mg	CHIKV, 103 TCID50, 0.1mg	CHIKV, 105 TCID50, 0.1mg
	Number of replicates (n)	6, 5	6, 6	6, 6	6, 6	6, 6	6, 6	6, 6
	Chi square	0	0	0	2.195	3.669	5.604	5.5
	df	1	1	1	1	1	1	1
	P value	>0,9999	>0,9999	>0,9999	0.1385	0.0554	0.0179	0.019
	P value summary	ns	ns	ns	ns	ns	*	*
	Significant difference?	No	No	No	No	No	Yes	Yes
c)	Comparison of Symptomatic disease
	Log-rank (Mantel-Cox) test
	Groups	CHIKV, 105 TCID50, 0.0mg
		CHIKV, 103 TCID50, 0.1mg	CHIKV, 104 TCID50, 0.1mg	CHIKV, 105 TCID50, 0.1mg	CHIKV, 103 TCID50, 0.3mg	CHIKV, 104 TCID50, 0.3mg	CHIKV, 103 TCID50, 0.1mg	CHIKV, 105 TCID50, 0.1mg
	Number of replicates (n)	6, 5	6, 6	6, 6	6, 6	6, 6	6, 6	6, 6
	Chi square	7.037	11	8.241	2.689	8.313	5.492	5.492
	df	1	1	1	1	1	1	1
	P value	0.008	0.0009	0.0041	0.101	0.0039	0.0191	0.0191
	P value summary	**	***	**	ns	**	*	*
	Significant difference?	Yes	Yes	Yes	No	Yes	Yes	Yes
d)	Normality test of viral loads 1/2
	Shapiro-Wilk normality test
	Groups	CHIKV, 103 TCID50, 0.1mg		CHIKV, 104 TCID50, 0.1mg		CHIKV, 105 TCID50, 0.1mg		CHIKV, 103 TCID50, 0.3mg
	day	2	4	2	4	2	4	2	4
	Number of replicates (n)	5	5	6	6	6	6	6	6
	W	0.828	0.6553	0.8127	0.6199	0.8206	0.9365	0.7008	0.8119
	P value	0.1345	0.0031	0.0763	0.0008	0.0893	0.6315	0.0063	0.075
	Passed normality test (alpha=0.05)?	Yes	No	Yes	No	Yes	Yes	No	Yes
	P value summary	ns	**	ns	***	ns	ns	**	ns
	Normality test of viral loads 2/2
	Shapiro-Wilk normality test
	Groups	CHIKV, 104 TCID50, 0.3mg		CHIKV, 103 TCID50, 0.1mg		CHIKV, 105 TCID50, 0.1mg		CHIKV, 105 TCID50, 0.0mg
	day	2	4	2	4	2	4	3
	Number of replicates (n)	6	6	6	6	6	6	6
	W	0.9105	0.9076	0.9002	0.9777	0.8904	0.8631	0.9184
	P value	0.4395	0.421	0.3754	0.8887	0.3201	0.2001	0.4937
	Passed normality test (alpha=0.05)?	Yes	Yes	Yes	Yes	Yes	Yes	Yes
	P value summary	ns	ns	ns	ns	ns	ns	ns
e)	Comparison of viral loads 1/2
	T-test
	Groups	105 TCID50, 0.0mg, 3dpi
		CHIKV, 103 TCID50, 0.1mg		CHIKV, 104 TCID50, 0.1mg		CHIKV, 105 TCID50, 0.1mg		CHIKV, 103 TCID50, 0.3mg
	day	2	4	2	4	2	4	2	4
	Two-sided test used	Unpaired t test with Welch's correction	Mann-Whitney	Unpaired t test	Mann-Whitney	Unpaired t test	Unpaired t test	Mann-Whitney	Unpaired t test with Welch's correction
	P value	0.1017	0.1255	<0,0001	0.0649	0.0041	0.0005	0.2749	0.101
	P value summary	ns	ns	****	ns	**	***	ns	ns
	Significantly different (P < 0.05)?	No	No	Yes	No	Yes	Yes	No	No
	One- or two-tailed P value?	Two-tailed	Two-tailed	Two-tailed	Two-tailed	Two-tailed	Two-tailed	Two-tailed	Two-tailed
	Welch-corrected t, df	t=2,033, df=4,672	-	t=12,05, df=10	-	t=3,704, df=10	t=5,052, df=10	-	t=1,959, df=5,628
	Comparison of viral loads 2/2
	T-test
	Groups	CHIKV, 105 TCID50, 0.0mg
		CHIKV, 104 TCID50, 0.3mg		CHIKV, 103 TCID50, 0.1mg		CHIKV, 105 TCID50, 0.1mg
	day	2	4	2	4	2	4
	Two-sided test used	Unpaired t test with Welch's correction	Unpaired t test	Unpaired t test with Welch's correction	Unpaired t test with Welch's correction	Unpaired t test	Unpaired t test
	P value	0.3415	0.0052	0.3573	0.3775	0.0451	0.0017
	P value summary	ns	**	ns	ns	*	**
	Significantly different (P < 0.05)?	No	Yes	No	No	Yes	Yes
	One- or two-tailed P value?	Two-tailed	Two-tailed	Two-tailed	Two-tailed	Two-tailed	Two-tailed
	Welch-corrected t, df	t=1,036, df=5,764	t=3,560, df=10	t=0,9995, df=5,820	t=1,013, df=3,414	t=2,289, df=10	t=4,238, df=10

## Sheet: Table S4
Supplementary Table 4: Statistical analysis of CHIKV infection in young and mature mice with a preceding dose of 0.1mg anti-IFNAR1 mAb and a high viral titer of 105TCID50.
a)	Comparison of Survival
	Log-rank (Mantel-Cox) test
	Groups	CHIKV, 105 TCID50, 0.1mg, 7 weeks old
		CHIKV, 105 TCID50, 0.1mg, 11 weeks old
	Number of replicates (n)	6, 6
	Chi square	0
	df	1
	P value	>0,9999
	P value summary	ns
	Significant difference?	No
b)	Comparison of Severe disease
	Log-rank (Mantel-Cox) test
	Groups	CHIKV, 105 TCID50, 0.1mg, 7 weeks old
		CHIKV, 105 TCID50, 0.1mg, 11 weeks old
	Number of replicates (n)	6, 6
	Chi square	2.2
	df	1
	P value	0.138
	P value summary	ns
	Significant difference?	No
c)	Comparison of Symptomatic disease
	Log-rank (Mantel-Cox) test
	Groups	CHIKV, 105 TCID50, 0.1mg, 7 weeks old
		CHIKV, 105 TCID50, 0.1mg, 11 weeks old
	Number of replicates (n)	6, 6
	Chi square	0.9167
	df	1
	P value	0.3383
	P value summary	ns
	Significant difference?	No
d)	Normality test of viral loads
	Shapiro-Wilk normality test
	Groups	CHIKV, 105 TCID50, 0.1mg, 7 weeks old	CHIKV, 105 TCID50, 0.1mg, 11 weeks old
	day	3	3
	Number of replicates (n)	6	6
	W	0.8611	0.6958
	P value	0.193	0.0056
	Passed normality test (alpha=0.05)?	Yes	No
	P value summary	ns	**
e)	Comparison of viral loads
	T-test
	Groups	CHIKV, 105 TCID50, 0.1mg, 7 weeks old
		CHIKV, 105 TCID50, 0.1mg, 11 weeks old
	day	3
	Two-sided test used	Unpaired t test with Welch's correction
	P value	0.4848
	P value summary	ns
	Significantly different (P < 0.05)?	No
	One- or two-tailed P value?	Two-tailed
	Welch-corrected t, df	-

## Sheet: Table S5
Supplementary Table 5: Statistical analysis of MAYV infection with very high or very low preceding doses of anti-IFNAR1 mAb.
a)	Comparison of Survival
	Log-rank (Mantel-Cox) test
	Groups	MAYV, 104 TCID50, 0.0mg, 24h
		MAYV, 103 TCID50, 0.1mg, 24h	MAYV, 104 TCID50, 1.0mg, 24h	MAYV, 103 TCID50, 0,1mg, 48h	MAYV, 104 TCID50, 1,0mg, 48h
	Number of replicates (n)	6, 6	6, 6	6, 6	6, 6
	Chi square	0	5.616	0	7.875
	df	1	1	1	1
	P value	>0,9999	0.0178	>0,9999	0.005
	P value summary	ns	*	ns	**
	Are the survival curves sig different?	No	Yes	No	Yes
b)	Comparison of Severe disease
	Log-rank (Mantel-Cox) test
	Groups	MAYV, 104 TCID50, 0.0mg, 24h
		MAYV, 103 TCID50, 0.1mg, 24h	MAYV, 104 TCID50, 1.0mg, 24h	MAYV, 103 TCID50, 0,1mg, 48h	MAYV, 104 TCID50, 1,0mg, 48h
	Number of replicates (n)	6, 6	6, 6	6, 6	6, 6
	Chi square	1	5.616	0	7.942
	df	1	1	1	1
	P value	0.3173	0.0178	>0,9999	0.0048
	P value summary	ns	*	ns	**
	Are the survival curves sig different?	No	Yes	No	Yes
c)	Comparison of Symptomatic disease
	Log-rank (Mantel-Cox) test
	Groups	MAYV, 104 TCID50, 0.0mg, 24h
		MAYV, 103 TCID50, 0.1mg, 24h	MAYV, 104 TCID50, 1.0mg, 24h	MAYV, 103 TCID50, 0,1mg, 48h	MAYV, 104 TCID50, 1,0mg, 48h
	Number of replicates (n)	6, 6	6, 6	6, 6	6, 6
	Chi square	0.8826	3.948	2.048	5.579
	df	1	1	1	1
	P value	0.3475	0.0469	0.1524	0.0182
	P value summary	ns	*	ns	*
	Are the survival curves sig different?	No	Yes	No	Yes

## Sheet: Table S6
Supplementary Table 6: Statistical analysis of MAYV infection with 103TCID50 or 105TCID50 and a preceding dose of 0.1mg anti-IFNAR1 mAb (a-c) and MAYV infection in young and mature mice with a preceding dose of 0.1mg anti-IFNAR1 mAb and a high viral titer of 105TCID50 (d and e).
a)	Comparison of Survival
	Log-rank (Mantel-Cox) test
	Groups	MAYV, 105 TCID50, 0.1mg, 7 weeks old
		MAYV, 105 TCID50, 0.1mg, 11 weeks old
	Number of replicates (n)	6, 6
	Chi square	0
	df	1
	P value	>0,9999
	P value summary	ns
	Significant difference?	No
b)	Comparison of Severe disease
	Log-rank (Mantel-Cox) test
	Groups	MAYV, 105 TCID50, 0.1mg, 7 weeks old
		MAYV, 105 TCID50, 0.1mg, 11 weeks old
	Number of replicates (n)	6, 6
	Chi square	0
	df	1
	P value	>0,9999
	P value summary	ns
	Significant difference?	No
c)	Comparison of Symptomatic disease
	Log-rank (Mantel-Cox) test
	Groups	MAYV, 105 TCID50, 0.1mg, 7 weeks old
		MAYV, 105 TCID50, 0.1mg, 11 weeks old
	Number of replicates (n)	6, 6
	Chi square	3.432
	df	1
	P value	0.064
	P value summary	ns
	Significant difference?	No
d)	Normality test of viral loads
	Shapiro-Wilk normality test
	Groups	MAYV, 105 TCID50, 0.1mg, 7 weeks old	MAYV, 105 TCID50, 0.1mg, 11 weeks old
	day	3	3
	Number of replicates (n)	6	6
	W	0.6242	0.9533
	P value	0.0009	0.7669
	Passed normality test (alpha=0.05)?	No	Yes
	P value summary	***	ns
e)	Comparison of viral loads
	T-test
	Groups	MAYV, 105 TCID50, 0.1mg, 7 weeks old
		MAYV, 105 TCID50, 0.1mg, 11 weeks old
	day	3
	Two-sided test used	Mann-Whitney
	P value	0.0411
	P value summary	*
	Significantly different (P < 0.05)?	Yes
	One- or two-tailed P value?	Two-tailed
	Welch-corrected t, df	-

## Sheet: Table S7
Supplementary Table 7: Statistical analysis of viral loads in various organs after infection with the established model.
a)	Normality test of viral loads 1/2
	Shapiro-Wilk normality test
	Groups	CHIKV 105TCID50, 0.1mg
		brain		heart		liver		spleen		small intestine		large intestine
	day	3	4	3	4	3	4	3	4	3	4	3	4
	Number of replicates (n)	6	6	6	6	6	6	6	6	6	6	6	6
	W	0.8188	0.8813	0.8276	0.8961	0.8441	0.8931	0.9216	0.9834	0.9199	0.9633	0.7928	0.9051
	P value	0.0862	0.2748	0.1025	0.3517	0.1409	0.3349	0.5172	0.9672	0.5043	0.845	0.0506	0.4053
	Passed normality test (alpha=0.05)?	Yes	Yes	Yes	Yes	Yes	Yes	Yes	Yes	Yes	Yes	Yes	Yes
	P value summary	ns	ns	ns	ns	ns	ns	ns	ns	ns	ns	ns	ns
	Normality test of viral loads 2/2
	Shapiro-Wilk normality test
	Groups	CHIKV 105TCID50, 0.0mg
		brain		heart		liver		spleen		small intestine		large intestine
	day	3	4	3	4	3	4	3	4	3	4	3	4
	Number of replicates (n)	6	6	6	6	6	6	6	6	6	6	6	6
	W	0.6836	0.9276	0.7667	0.9693	0.8582	0.8991	0.8201	0.9193	0.8571	0.902	0.8072	0.694
	P value	0.0041	0.5614	0.0289	0.8874	0.1832	0.3687	0.0884	0.5007	0.1794	0.386	0.0681	0.0053
	Passed normality test (alpha=0.05)?	No	Yes	No	Yes	Yes	Yes	Yes	Yes	Yes	Yes	Yes	No
	P value summary	**	ns	*	ns	ns	ns	ns	ns	ns	ns	ns	**
b)	Comparison of viral loads
	T-test
	Groups	CHIKV 105TCID50, 0.1mg
		CHIKV 105TCID50, 0.0mg
		brain		heart		liver		spleen		small intestine		large intestine
	day	3	4	3	4	3	4	3	4	3	4	3	4
	Two-sided test used	Mann-Whitney	Unpaired t test with Welch's correction	Mann-Whitney	Unpaired t test with Welch's correction	Unpaired t test	Unpaired t test	Unpaired t test with Welch's correction	Unpaired t test with Welch's correction	Unpaired t test	Unpaired t test with Welch's correction	Unpaired t test	Mann-Whitney
	P value	0.0087	<0,0001	0.0152	0.0002	0.0098	<0,0001	0.0166	0.0012	0.0252	<0,0001	0.0061	0.0003
	P value summary	**	****	*	***	**	****	*	**	*	****	**	***
	Significantly different (P < 0.05)?	Yes	Yes	Yes	Yes	Yes	Yes	Yes	Yes	Yes	Yes	Yes	Yes
	One- or two-tailed P value?	Two-tailed	Two-tailed	Two-tailed	Two-tailed	Two-tailed	Two-tailed	Two-tailed	Two-tailed	Two-tailed	Two-tailed	Two-tailed	Two-tailed
	Welch-corrected t, df	-	t=13,99, df=5,196	-	t=9,142, df=5,178	t=3,183, df=10	t=14,96, df=10	t=3,325, df=5,838	t=6,464, df=5,125	t=2,630, df=10	t=14,45, df=6,053	t=3,462, df=10	t=5,424, df=10
c)	Normality test of viral loads 1/2
	Shapiro-Wilk normality test
	Groups	MAYV 105TCID50, 0.1mg
		brain		heart		liver		spleen		small intestine		large intestine
	day	3	4	3	4	3	4	3	4	3	4	3	4
	Number of replicates (n)	6	6	6	6	6	6	6	6	6	6	6	6
	W	0.7461	0.9541	0.7408	0.9073	0.6669	0.9438	0.9161	0.8789	0.9165	0.9369	0.8019	0.7805
	P value	0.0182	0.7733	0.0162	0.4191	0.0027	0.6903	0.4775	0.264	0.4805	0.6346	0.0611	0.039
	Passed normality test (alpha=0.05)?	No	Yes	No	Yes	No	Yes	Yes	Yes	Yes	Yes	Yes	No
	P value summary	*	ns	*	ns	**	ns	ns	ns	ns	ns	ns	*
	Normality test of viral loads 2/2
	Shapiro-Wilk normality test
	Groups	MAYV 105TCID50, 0.0mg
		brain		heart		liver		spleen		small intestine		large intestine
	day	3	4	3	4	3	4	3	4	3	4	3	4
	Number of replicates (n)	6	6	6	6	6	6	6	6	6	6	6	6
	W	0.8641	0.7397	0.8706	0.9562	0.8341	0.8717	0.9346	0.8382	0.8752	0.8671	0.8646	0.9157
	P value	0.2036	0.0158	0.2284	0.7901	0.1163	0.2332	0.6164	0.1259	0.2477	0.2149	0.2056	0.4749
	Passed normality test (alpha=0.05)?	Yes	No	Yes	Yes	Yes	Yes	Yes	Yes	Yes	Yes	Yes	Yes
	P value summary	ns	*	ns	ns	ns	ns	ns	ns	ns	ns	ns	ns
d)	Comparison of viral loads
	T-test
	Groups	MAYV 105TCID50, 0.1mg
		MAYV 105TCID50, 0.0mg
		brain		heart		liver		spleen		small intestine		large intestine
	day	3	4	3	4	3	4	3	4	3	4	3	4
	Two-sided test used	Mann-Whitney	Mann-Whitney	Mann-Whitney	Unpaired t test with Welch's correction	Mann-Whitney	Unpaired t test with Welch's correction	Unpaired t test with Welch's correction	Unpaired t test	Unpaired t test with Welch's correction	Unpaired t test with Welch's correction	Unpaired t test	Mann-Whitney
	P value	0.0411	0.0043	0.0152	0.0849	0.026	0.0384	0.0068	0.0766	0.0393	0.0681	0.3476	0.3939
	P value summary	*	**	*	ns	*	*	**	ns	*	ns	ns	ns
	Significantly different (P < 0.05)?	Yes	Yes	Yes	No	Yes	Yes	Yes	No	Yes	No	No	No
	One- or two-tailed P value?	Two-tailed	Two-tailed	Two-tailed	Two-tailed	Two-tailed	Two-tailed	Two-tailed	Two-tailed	Two-tailed	Two-tailed	Two-tailed	Two-tailed
	Welch-corrected t, df	-	-	-	t=2,115, df=5,298	-	t=2,764, df=5,148	t=3,909, df=6,489	t=1,974, df=10	t=2,652, df=5,786	t=2,314, df=5,039	t=0,9855, df=10	-
e)	Normality test of viral loads 1/2
	Shapiro-Wilk normality test
	Groups	ONNV 105TCID50, 0.1mg
		brain		heart		liver		spleen		small intestine		large intestine
	day	3	4	3	4	3	4	3	4	3	4	3	4
	Number of replicates (n)	6	6	6	6	6	6	6	6	6	6	6	6
	W	0.6496	0.5769	0.7092	0.5343	0.9654	0.8088	0.9087	0.9432	0.8431	0.626	0.9184	0.9551
	P value	0.0017	0.0002	0.0077	<0,0001	0.8605	0.0705	0.4278	0.685	0.1382	0.0009	0.4936	0.7812
	Passed normality test (alpha=0.05)?	No	No	No	No	Yes	Yes	Yes	Yes	Yes	No	Yes	Yes
	P value summary	**	***	**	****	ns	ns	ns	ns	ns	***	ns	ns
	Normality test of viral loads 2/2
	Shapiro-Wilk normality test
	Groups	ONNV 105TCID50, 0.0mg
		brain		heart		liver		spleen		small intestine		large intestine
	day	3	4	3	4	3	4	3	4	3	4	3	4
	Number of replicates (n)	6	6	6	6	6	6	6	6	6	6	6	6
	W	0.9468	0.9512	0.8822	0.8167	0.9893	0.8664	0.8452	0.9519	0.9406	0.9761	0.9664	0.9843
	P value	0.7142	0.7502	0.2794	0.0827	0.9873	0.2122	0.1438	0.7557	0.6643	0.9307	0.8676	0.971
	Passed normality test (alpha=0.05)?	Yes	Yes	Yes	Yes	Yes	Yes	Yes	Yes	Yes	Yes	Yes	Yes
	P value summary	ns	ns	ns	ns	ns	ns	ns	ns	ns	ns	ns	ns
f)	Comparison of viral loads
	T-test
	Groups	ONNV 105TCID50, 0.1mg
		ONNV 105TCID50, 0.0mg
		brain		heart		liver		spleen		small intestine		large intestine
	day	3	4	3	4	3	4	3	4	3	4	3	4
	Two-sided test used	Mann-Whitney	Mann-Whitney	Mann-Whitney	Mann-Whitney	Unpaired t test	Unpaired t test	Unpaired t test with Welch's correction	Unpaired t test with Welch's correction	Unpaired t test with Welch's correction	Mann-Whitney	Unpaired t test with Welch's correction	Unpaired t test
	P value	0.5887	0.5887	0.9004	0.1667	0.0398	0.1761	0.1397	0.2452	0.1347	0.4848	0.4398	0.328
	P value summary	Exact	Exact	Exact	Exact	*	ns	ns	ns	ns	Exact	ns	ns
	Significantly different (P < 0.05)?	ns	ns	ns	ns	Yes	No	No	No	No	ns	No	No
	One- or two-tailed P value?	No	No	No	No	Two-tailed	Two-tailed	Two-tailed	Two-tailed	Two-tailed	No	Two-tailed	Two-tailed
	Welch-corrected t, df	Two-tailed	Two-tailed	Two-tailed	Two-tailed	t=2,362, df=10	t=1,456, df=10	t=1,741, df=5,225	t=1,303, df=5,415	t=1,771, df=5,174	Two-tailed	t=0,8271, df=6,010	t=1,028, df=10

## Sheet: Table S8
Supplementary Table 8: Statistical analysis of infectious viral loads in various organs after infection with the established model.
a)	Normality test of viral loads
	Shapiro-Wilk normality test
	Groups	CHIKV 105TCID50, 0.1mg			CHIKV 105TCID50, 0.0mg
		brain	heart	spleen	brain	heart	spleen
	day	3	3	3	3	3	3
	Number of replicates (n)	6	6	6	6	6	6
	W	0.6236	0.8453	0.915	0.8285	0.5592	0.6861
	P value	0.0009	0.144	0.4703	0.1043	0.0001	0.0044
	Passed normality test (alpha=0.05)?	No	Yes	Yes	Yes	No	No
	P value summary	***	ns	ns	ns	***	**
b)	Comparison of viral loads
	T-test
	Groups	CHIKV 105TCID50, 0.1mg
		CHIKV 105TCID50, 0.0mg
		brain	heart	spleen
	day	3	3	3
	Two-sided test used	Mann-Whitney	Mann-Whitney	Mann-Whitney
	P value	0.1688	0.0152	0.3074
	P value summary	ns	*	ns
	Significantly different (P < 0.05)?	No	Yes	No
	One- or two-tailed P value?	Two-tailed	Two-tailed	Two-tailed
	Welch-corrected t, df	-	-	-
c)	Normality test of viral loads 1/2
	Shapiro-Wilk normality test
	Groups	MAYV 105TCID50, 0.1mg			MAYV 105TCID50, 0.0mg
		brain	heart	spleen	brain	heart	spleen
	day	3	3	3	3	3	3
	Number of replicates (n)	6	6	6	6	6	6
	W	0.9343	0.9437	0.8442	0.7004	0.5838	0.834
	P value	0.6134	0.6891	0.1413	0.0062	0.0003	0.1163
	Passed normality test (alpha=0.05)?	Yes	Yes	Yes	No	No	Yes
	P value summary	ns	ns	ns	**	***	ns
d)	Comparison of viral loads
	T-test
	Groups	MAYV 105TCID50, 0.1mg
		MAYV 105TCID50, 0.0mg
		brain	heart	spleen
	day	3	3	3
	Two-sided test used	Mann-Whitney	Mann-Whitney	Unpaired t test with Welch's correction
	P value	0.0043	0.2403	0.0218
	P value summary	**	ns	*
	Significantly different (P < 0.05)?	Yes	No	Yes
	One- or two-tailed P value?	Two-tailed	Two-tailed	Two-tailed
	Welch-corrected t, df	-	-	t=2,781, df=8,798
e)	Normality test of viral loads 1/2
	Shapiro-Wilk normality test
	Groups	ONNV 105TCID50, 0.1mg			ONNV 105TCID50, 0.0mg
		brain	heart	spleen	brain	heart	spleen
	day	3	3	3	3	3	3
	Number of replicates (n)	6	6	6	6	6	6
	W	0.8222	0.8968	0.9267	0.9222	0.8687	0.8512
	P value	0.0922	0.3555	0.5548	0.5214	0.2212	0.1609
	Passed normality test (alpha=0.05)?	Yes	Yes	Yes	Yes	Yes	Yes
	P value summary	ns	ns	ns	ns	ns	ns
f)	Comparison of viral loads
	T-test
	Groups	ONNV 105TCID50, 0.1mg
		ONNV 105TCID50, 0.0mg
		brain	heart	spleen
	day	3	3	3
	Two-sided test used	Unpaired t test	Unpaired t test	Unpaired t test
	P value	0.1771	0.2897	0.0333
	P value summary	ns	ns	*
	Significantly different (P < 0.05)?	No	No	Yes
	One- or two-tailed P value?	Two-tailed	Two-tailed	Two-tailed
	Welch-corrected t, df	t=1,452, df=10	t=1,118, df=10	t=2,466, df=10

## Sheet: Table S9
Supplementary Table 9: Statistical analysis of serum cytokine concentrations after infection with the established model.
a)	Normality test of serum INF-α loads
	Shapiro-Wilk normality test
	Groups	CHIKV 105TCID50, 0.1mg		CHIKV 105TCID50, 0.0mg		MAYV 105TCID50, 0.1mg		MAYV 105TCID50, 0.0mg		ONNV 105TCID50, 0.1mg		ONNV 105TCID50, 0.0mg		Mock infection, 0.0mg
	day	3	4	3	4	3	4	3	4	3	4	3	4	3	4
	Number of replicates (n)	6	6	6	6	6	6	6	6	6	6	6	6	6	6
	W	0.7942	0.9422	0.9508	0.8069	0.6554	0.7638	0.9056	0.6473	0.9718	0.9073	Invalid input data	0.6461	Invalid input data	0.8375
	P value	0.0521	0.6771	0.7468	0.0677	0.002	0.0271	0.4081	0.0016	0.904	0.4516		0.0016		0.1242
	Passed normality test (alpha=0.05)?	Yes	Yes	Yes	Yes	No	No	Yes	No	Yes	Yes		No		Yes
	P value summary	ns	ns	ns	ns	**	*	ns	**	ns	ns		**		ns
b)	Comparison of serum INF-α loads 1/2
	T-test
	Groups	CHIKV 105TCID50, 0.1mg		MAYV 105TCID50, 0.1mg		ONNV 105TCID50, 0.1mg
		CHIKV 105TCID50, 0.0mg		MAYV 105TCID50, 0.0mg		ONNV 105TCID50, 0.0mg
	day	3	4	3	4	3	4
	Two-sided test used	Unpaired t test	Unpaired t test	Mann-Whitney	Mann-Whitney	Mann-Whitney	Mann-Whitney
	P value	0.0001	0.0001	0.0649	0.0022	0.0152	0.21
	P value summary	***	***	ns	**	*	ns
	Significantly different (P < 0.05)?	Yes	Yes	No	Yes	Yes	No
	One- or two-tailed P value?	Two-tailed	Two-tailed	Two-tailed	Two-tailed	Two-tailed	Two-tailed
	Welch-corrected t, df	t=5,972, df=10	t=6,195, df=10	-	-	-	-
	Comparison of serum INF-α loads 2/2
	T-test
	Groups	Mock infection, 0.0mg
		CHIKV 105TCID50, 0.1mg		CHIKV 105TCID50, 0.0mg		MAYV 105TCID50, 0.1mg		MAYV 105TCID50, 0.0mg		ONNV 105TCID50, 0.1mg		ONNV 105TCID50, 0.0mg
	day	3	4	3	4	3	4	3	4	3	4	3	4
	Two-sided test used	Mann-Whitney	Unpaired t test	Mann-Whitney	Unpaired t test	Mann-Whitney	Mann-Whitney	Mann-Whitney	Mann-Whitney	Mann-Whitney	Unpaired t test	Mann-Whitney	Mann-Whitney
	P value	0.0022	0.0001	0.0152	0.9722	0.0152	0.0628	0.0022	0.3182	0.0152	0.661	>0,9999	0.3939
	P value summary	**	***	*	ns	*	ns	**	ns	*	ns	ns	ns
	Significantly different (P < 0.05)?	Yes	Yes	Yes	No	Yes	No	Yes	No	Yes	No	No	No
	One- or two-tailed P value?	Two-tailed	Two-tailed	Two-tailed	Two-tailed	Two-tailed	Two-tailed	Two-tailed	Two-tailed	Two-tailed	Two-tailed	Two-tailed	Two-tailed
	Welch-corrected t, df	-	t=6,201, df=10	-	t=0,03572, df=10	-	-	-	-	-	t=0,4533, df=9	-	-
c)	Normality test of serum INF-γ loads
	Shapiro-Wilk normality test
	Groups	CHIKV 105TCID50, 0.1mg		CHIKV 105TCID50, 0.0mg		MAYV 105TCID50, 0.1mg		MAYV 105TCID50, 0.0mg		ONNV 105TCID50, 0.1mg		ONNV 105TCID50, 0.0mg		Mock infection, 0.0mg
	day	3	4	3	4	3	4	3	4	3	4	3	4	3	4
	Number of replicates (n)	6	6	6	6	6	6	6	6	6	6	6	6	6	6
	W	0.9778	0.8552	0.6963	0.9385	0.7024	0.7073	0.8104	0.8423	0.9691	0.8289	0.9736	0.935	0.9336	0.8852
	P value	0.9399	0.1734	0.0056	0.6474	0.0066	0.0074	0.0727	0.1363	0.8865	0.1366	0.9155	0.6194	0.6082	0.2936
	Passed normality test (alpha=0.05)?	Yes	Yes	No	Yes	No	No	Yes	Yes	Yes	Yes	Yes	Yes	Yes	Yes
	P value summary	ns	ns	**	ns	**	**	ns	ns	ns	ns	ns	ns	ns	ns
d)	Comparison of serum INF-γ loads 1/2
	T-test
	Groups	CHIKV 105TCID50, 0.1mg		MAYV 105TCID50, 0.1mg		ONNV 105TCID50, 0.1mg
		CHIKV 105TCID50, 0.0mg		MAYV 105TCID50, 0.0mg		ONNV 105TCID50, 0.0mg
	day	3	4	3	4	3	4
	Two-sided test used	Mann-Whitney	Unpaired t test	Mann-Whitney	Mann-Whitney	Unpaired t test	Unpaired t test
	P value	0.0043	0.028	0.026	0.1797	0.892	0.14
	P value summary	**	*	*	ns	ns	ns
	Significantly different (P < 0.05)?	Yes	Yes	Yes	No	No	No
	One- or two-tailed P value?	Two-tailed	Two-tailed	Two-tailed	Two-tailed	Two-tailed	Two-tailed
	Welch-corrected t, df	-	t=2,568, df=10	-	-	t=0,1392, df=10	t=1,619, df=9
	Comparison of serum INF-γ loads 2/2
	T-test
	Groups	Mock infection, 0.0mg
		CHIKV 105TCID50, 0.1mg		CHIKV 105TCID50, 0.0mg		MAYV 105TCID50, 0.1mg		MAYV 105TCID50, 0.0mg		ONNV 105TCID50, 0.1mg		ONNV 105TCID50, 0.0mg
	day	3	4	3	4	3	4	3	4	3	4	3	4
	Two-sided test used	Unpaired t test	Unpaired t test	Mann-Whitney	Unpaired t test	Mann-Whitney	Mann-Whitney	Unpaired t test	Unpaired t test with Welch's correction	Unpaired t test	Unpaired t test	Unpaired t test	Unpaired t test
	P value	0.0014	0.0037	0.3939	0.3426	0.0152	0.0649	0.8136	0.7021	0.0303	0.5351	0.0046	0.2086
	P value summary	**	**	ns	ns	*	ns	ns	ns	*	ns	**	ns
	Significantly different (P < 0.05)?	Yes	Yes	No	No	Yes	No	No	No	Yes	No	Yes	No
	One- or two-tailed P value?	Two-tailed	Two-tailed	Two-tailed	Two-tailed	Two-tailed	Two-tailed	Two-tailed	Two-tailed	Two-tailed	Two-tailed	Two-tailed	Two-tailed
	Welch-corrected t, df	t=4,355, df=10	t=3,756, df=10	-	t=0,9962, df=10	-	-	t=0,2421, df=10	t=0,4009, df=6,136	t=2,521, df=10	t=0,6448, df=9	t=3,635, df=10	t=1,344, df=10
e)	Normality test of serum MCP-1 loads
	Shapiro-Wilk normality test
	Groups	CHIKV 105TCID50, 0.1mg		CHIKV 105TCID50, 0.0mg		MAYV 105TCID50, 0.1mg		MAYV 105TCID50, 0.0mg		ONNV 105TCID50, 0.1mg		ONNV 105TCID50, 0.0mg		Mock infection, 0.0mg
	day	3	4	3	4	3	4	3	4	3	4	3	4	3	4
	Number of replicates (n)	6	6	6	6	6	6	6	6	6	6	6	6	6	6
	W	0.9563	0.9157	0.8916	0.7012	0.7153	0.7269	0.7531	0.4961	0.8212	0.5522	Invalid input data	0.4961	Invalid input data	0.6892
	P value	0.7912	0.4751	0.3264	0.0064	0.0089	0.0117	0.0214	<0,0001	0.0905	0.0001		<0,0001		0.0047
	Passed normality test (alpha=0.05)?	Yes	Yes	Yes	No	No	No	No	No	Yes	No		No		No
	P value summary	ns	ns	ns	**	**	*	*	****	ns	***		****		**
f)	Comparison of serum MCP-1 loads 1/2
	T-test
	Groups	CHIKV 105TCID50, 0.1mg		MAYV 105TCID50, 0.1mg		ONNV 105TCID50, 0.1mg
		CHIKV 105TCID50, 0.0mg		MAYV 105TCID50, 0.0mg		ONNV 105TCID50, 0.0mg
	day	3	4	3	4	3	4
	Two-sided test used	Unpaired t test	Mann-Whitney	Mann-Whitney	Mann-Whitney	Mann-Whitney	Mann-Whitney
	P value	0.0028	0.0022	0.0411	0.1818	0.1818	>0,9999
	P value summary	**	**	*	ns	ns	ns
	Significantly different (P < 0.05)?	Yes	Yes	Yes	No	No	No
	One- or two-tailed P value?	Two-tailed	Two-tailed	Two-tailed	Two-tailed	Two-tailed	Two-tailed
	Welch-corrected t, df	t=3,935, df=10	-	-	-	-	-
	Comparison of serum MCP-1 loads 2/2
	T-test
	Groups	Mock infection, 0.0mg
		CHIKV 105TCID50, 0.1mg		CHIKV 105TCID50, 0.0mg		MAYV 105TCID50, 0.1mg		MAYV 105TCID50, 0.0mg		ONNV 105TCID50, 0.1mg		ONNV 105TCID50, 0.0mg
	day	3	4	3	4	3	4	3	4	3	4	3	4
	Two-sided test used	Mann-Whitney	Mann-Whitney	Mann-Whitney	Mann-Whitney	Mann-Whitney	Mann-Whitney	Mann-Whitney	Mann-Whitney	Mann-Whitney	Mann-Whitney	Mann-Whitney	Mann-Whitney
	P value	0.0022	0.0022	0.0152	0.8485	0.0022	0.3182	0.0152	0.7273	0.1818	0.5758	>0,9999	0.7273
	P value summary	**	**	*	ns	**	ns	*	ns	ns	ns	ns	ns
	Significantly different (P < 0.05)?	Yes	Yes	Yes	No	Yes	No	Yes	No	No	No	No	No
	One- or two-tailed P value?	Two-tailed	Two-tailed	Two-tailed	Two-tailed	Two-tailed	Two-tailed	Two-tailed	Two-tailed	Two-tailed	Two-tailed	Two-tailed	Two-tailed
	Welch-corrected t, df	-	-	-	-	-	-	-	-	-	-	-	-
g)	Normality test of serum IL-6 loads
	Shapiro-Wilk normality test
	Groups	CHIKV 105TCID50, 0.1mg		CHIKV 105TCID50, 0.0mg		MAYV 105TCID50, 0.1mg		MAYV 105TCID50, 0.0mg		ONNV 105TCID50, 0.1mg		ONNV 105TCID50, 0.0mg		Mock infection, 0.0mg
	day	3	4	3	4	3	4	3	4	3	4	3	4	3	4
	Number of replicates (n)	6	6	6	6	6	6	6	6	6	6	6	6	6	6
	W	0.6794	Invalid input data	Invalid input data	0.4961	Invalid input data	Invalid input data	Invalid input data	Invalid input data	Invalid input data	Invalid input data	Invalid input data	Invalid input data	Invalid input data	Invalid input data
	P value	0.0037			<0,0001
	Passed normality test (alpha=0.05)?	No			No
	P value summary	**			****
h)	Comparison of serum IL-6 loads 1/2
	T-test
	Groups	CHIKV 105TCID50, 0.1mg		MAYV 105TCID50, 0.1mg		ONNV 105TCID50, 0.1mg
		CHIKV 105TCID50, 0.0mg		MAYV 105TCID50, 0.0mg		ONNV 105TCID50, 0.0mg
	day	3	4	3	4	3	4
	Two-sided test used	Mann-Whitney	Mann-Whitney	Mann-Whitney	Mann-Whitney	Mann-Whitney	Mann-Whitney
	P value	0.4545	>0,9999	not performed because no values above the LoD
	P value summary	ns	ns
	Significantly different (P < 0.05)?	No	No
	One- or two-tailed P value?	Two-tailed	Two-tailed
	Welch-corrected t, df	-	-
	Comparison of serum IL-6 loads 2/2
	T-test
	Groups	Mock infection, 0.0mg
		CHIKV 105TCID50, 0.1mg		CHIKV 105TCID50, 0.0mg		MAYV 105TCID50, 0.1mg		MAYV 105TCID50, 0.0mg		ONNV 105TCID50, 0.1mg		ONNV 105TCID50, 0.0mg
	day	3	4	3	4	3	4	3	4	3	4	3	4
	Two-sided test used	Mann-Whitney	Mann-Whitney	Mann-Whitney	Mann-Whitney	Mann-Whitney	Mann-Whitney	Mann-Whitney	Mann-Whitney	Mann-Whitney	Mann-Whitney	Mann-Whitney	Mann-Whitney
	P value	0.4545	not performed because no values above the LoD		>0,9999	not performed because no values above the LoD
	P value summary	ns			ns
	Significantly different (P < 0.05)?	No			No
	One- or two-tailed P value?	Two-tailed			Two-tailed
	Welch-corrected t, df	-			-
i)	Normality test of serum TNF-α loads
	Shapiro-Wilk normality test
	Groups	CHIKV 105TCID50, 0.1mg		CHIKV 105TCID50, 0.0mg		MAYV 105TCID50, 0.1mg		MAYV 105TCID50, 0.0mg		ONNV 105TCID50, 0.1mg		ONNV 105TCID50, 0.0mg		Mock infection, 0.0mg
	day	3	4	3	4	3	4	3	4	3	4	3	4	3	4
	Number of replicates (n)	6	6	6	6	6	6	6	6	6	6	6	6	6	6
	W	Invalid input data	Invalid input data	Invalid input data	Invalid input data	Invalid input data	Invalid input data	Invalid input data	Invalid input data	Invalid input data	Invalid input data	Invalid input data	Invalid input data	Invalid input data	Invalid input data
	P value
	Passed normality test (alpha=0.05)?
	P value summary
j)	Comparison of serum TNF-α loads 1/2
	T-test
	Groups	CHIKV 105TCID50, 0.1mg		MAYV 105TCID50, 0.1mg		ONNV 105TCID50, 0.1mg
		CHIKV 105TCID50, 0.0mg		MAYV 105TCID50, 0.0mg		ONNV 105TCID50, 0.0mg
	day	3	4	3	4	3	4
	Two-sided test used	not performed because no values above the LoD
	P value
	P value summary
	Significantly different (P < 0.05)?
	One- or two-tailed P value?
	Welch-corrected t, df
	Comparison of serum TNF-α loads 2/2
	T-test
	Groups	Mock infection, 0.0mg
		CHIKV 105TCID50, 0.1mg		CHIKV 105TCID50, 0.0mg		MAYV 105TCID50, 0.1mg		MAYV 105TCID50, 0.0mg		ONNV 105TCID50, 0.1mg		ONNV 105TCID50, 0.0mg
	day	3	4	3	4	3	4	3	4	3	4	3	4
	Two-sided test used	not performed because no values above the LoD
	P value
	P value summary
	Significantly different (P < 0.05)?
	One- or two-tailed P value?
	Welch-corrected t, df
